# Supplementary material
Source: publisher figshare collection journal article supplement (https://acs.figshare.com/ndownloader/files/3874987)
Supplement: Supplementary file 1 [file 3874987]

# Polymorphism and polytypism of $\alpha$ -LiNH<sub>4</sub>SO<sub>4</sub> crystals. Monte Carlo modeling based on X-ray diffuse scattering

Dorota Komornicka, Marek Wołczyrz,\* and Adam Pietraszko

Institute of Low Temperature and Structure Research, Polish Academy of Sciences,  
P.O. Box 1410, 50-950 Wrocław 2, Poland.

## Supporting Information

# I.

Comparison of calculated  
3*kl* section of reciprocal space  
and intensity profiles running through 11*l* line  
for 1-D model with different interaction parameters *J*  
according to the formula

$$H = - \sum_{i=1..n} J \cdot \delta(s_i, s_{i+1})$$

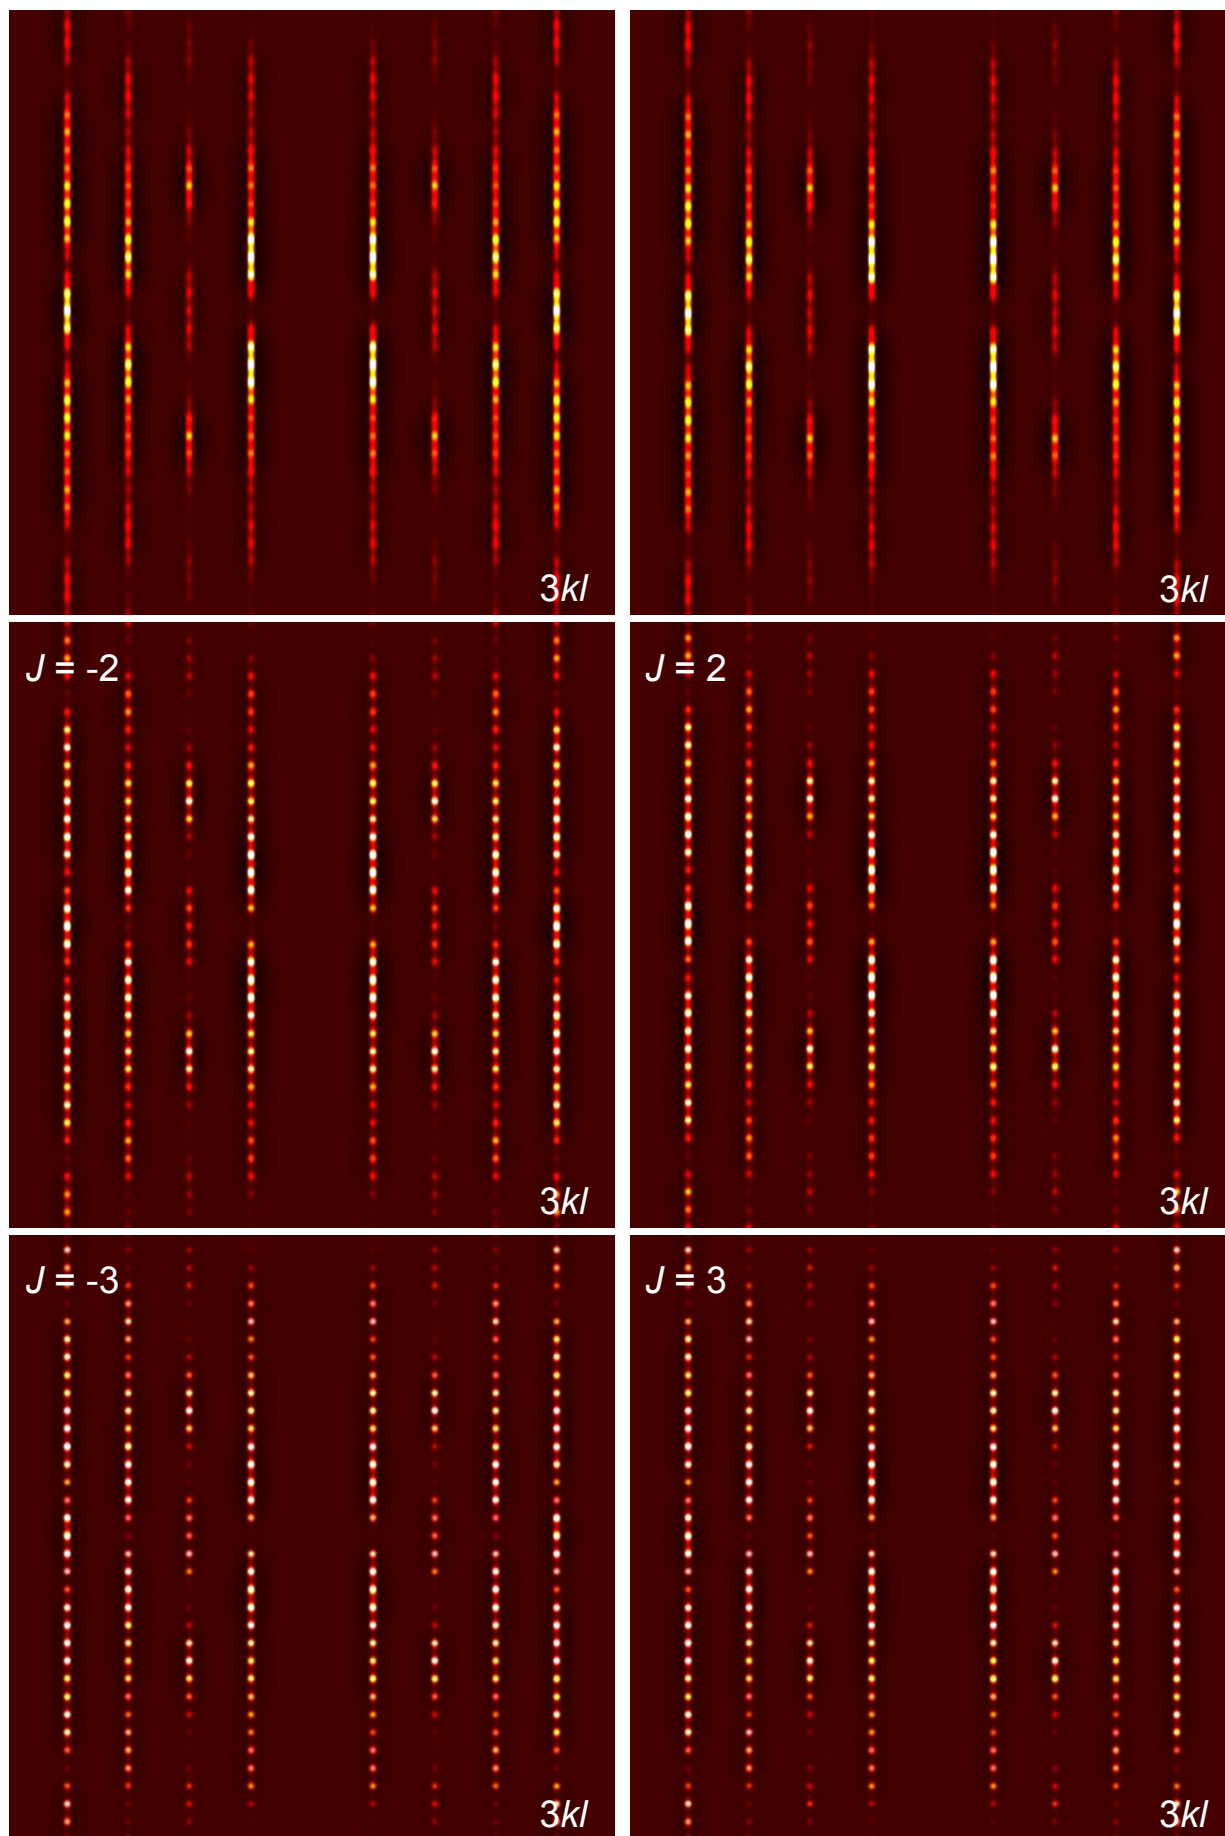

**Figure 1.** Comparison of calculated  $3kl$  section of reciprocal space for 1-D model with different value of interaction parameter  $J = -3; -2; -1; 1; 2; 3$ .

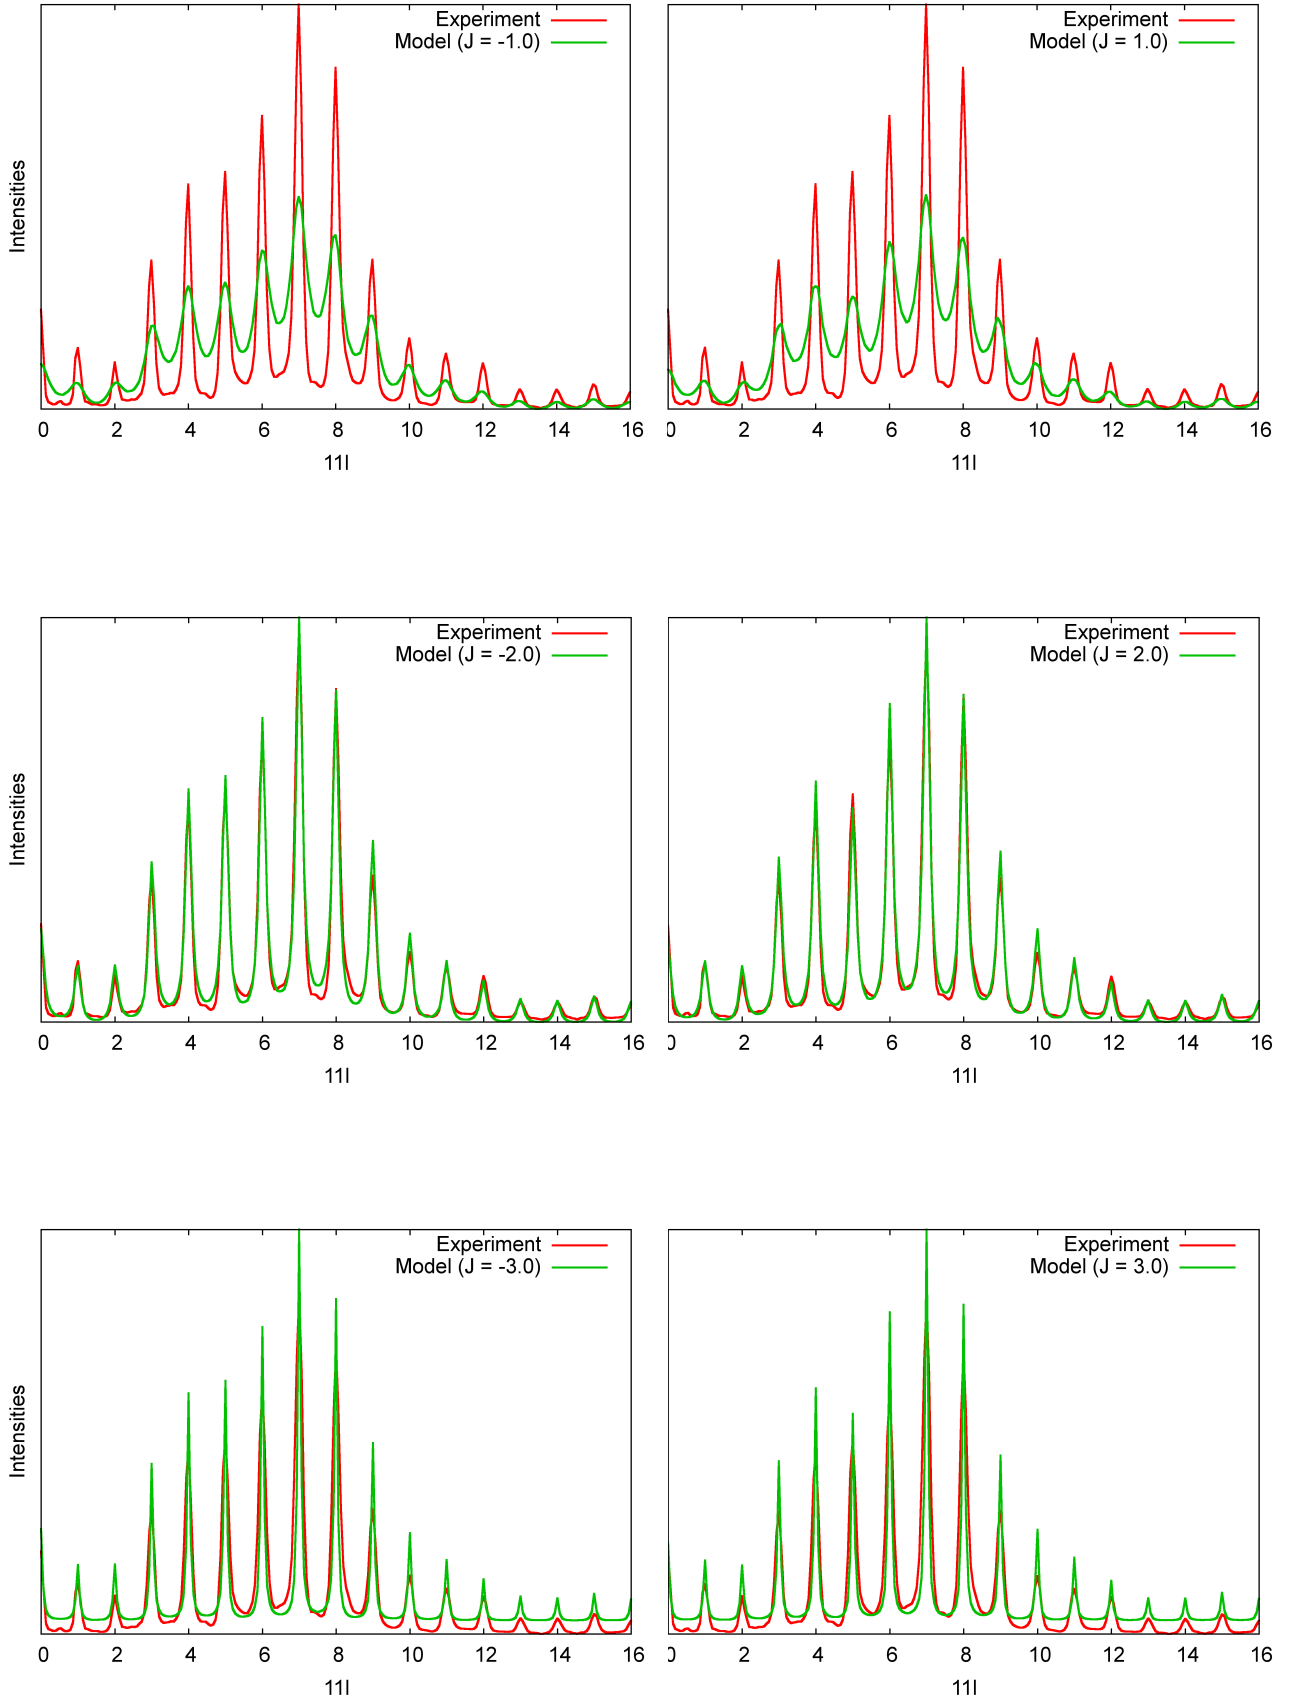

**Figure 2.** Comparison of calculated intensity profiles running through  $11l$  section of the reciprocal space for 1-D model with different value of interaction parameter  $J = -3$ ;  $-2$ ;  $-1$ ; and  $J = 1$ ;  $2$ ;  $3$ .

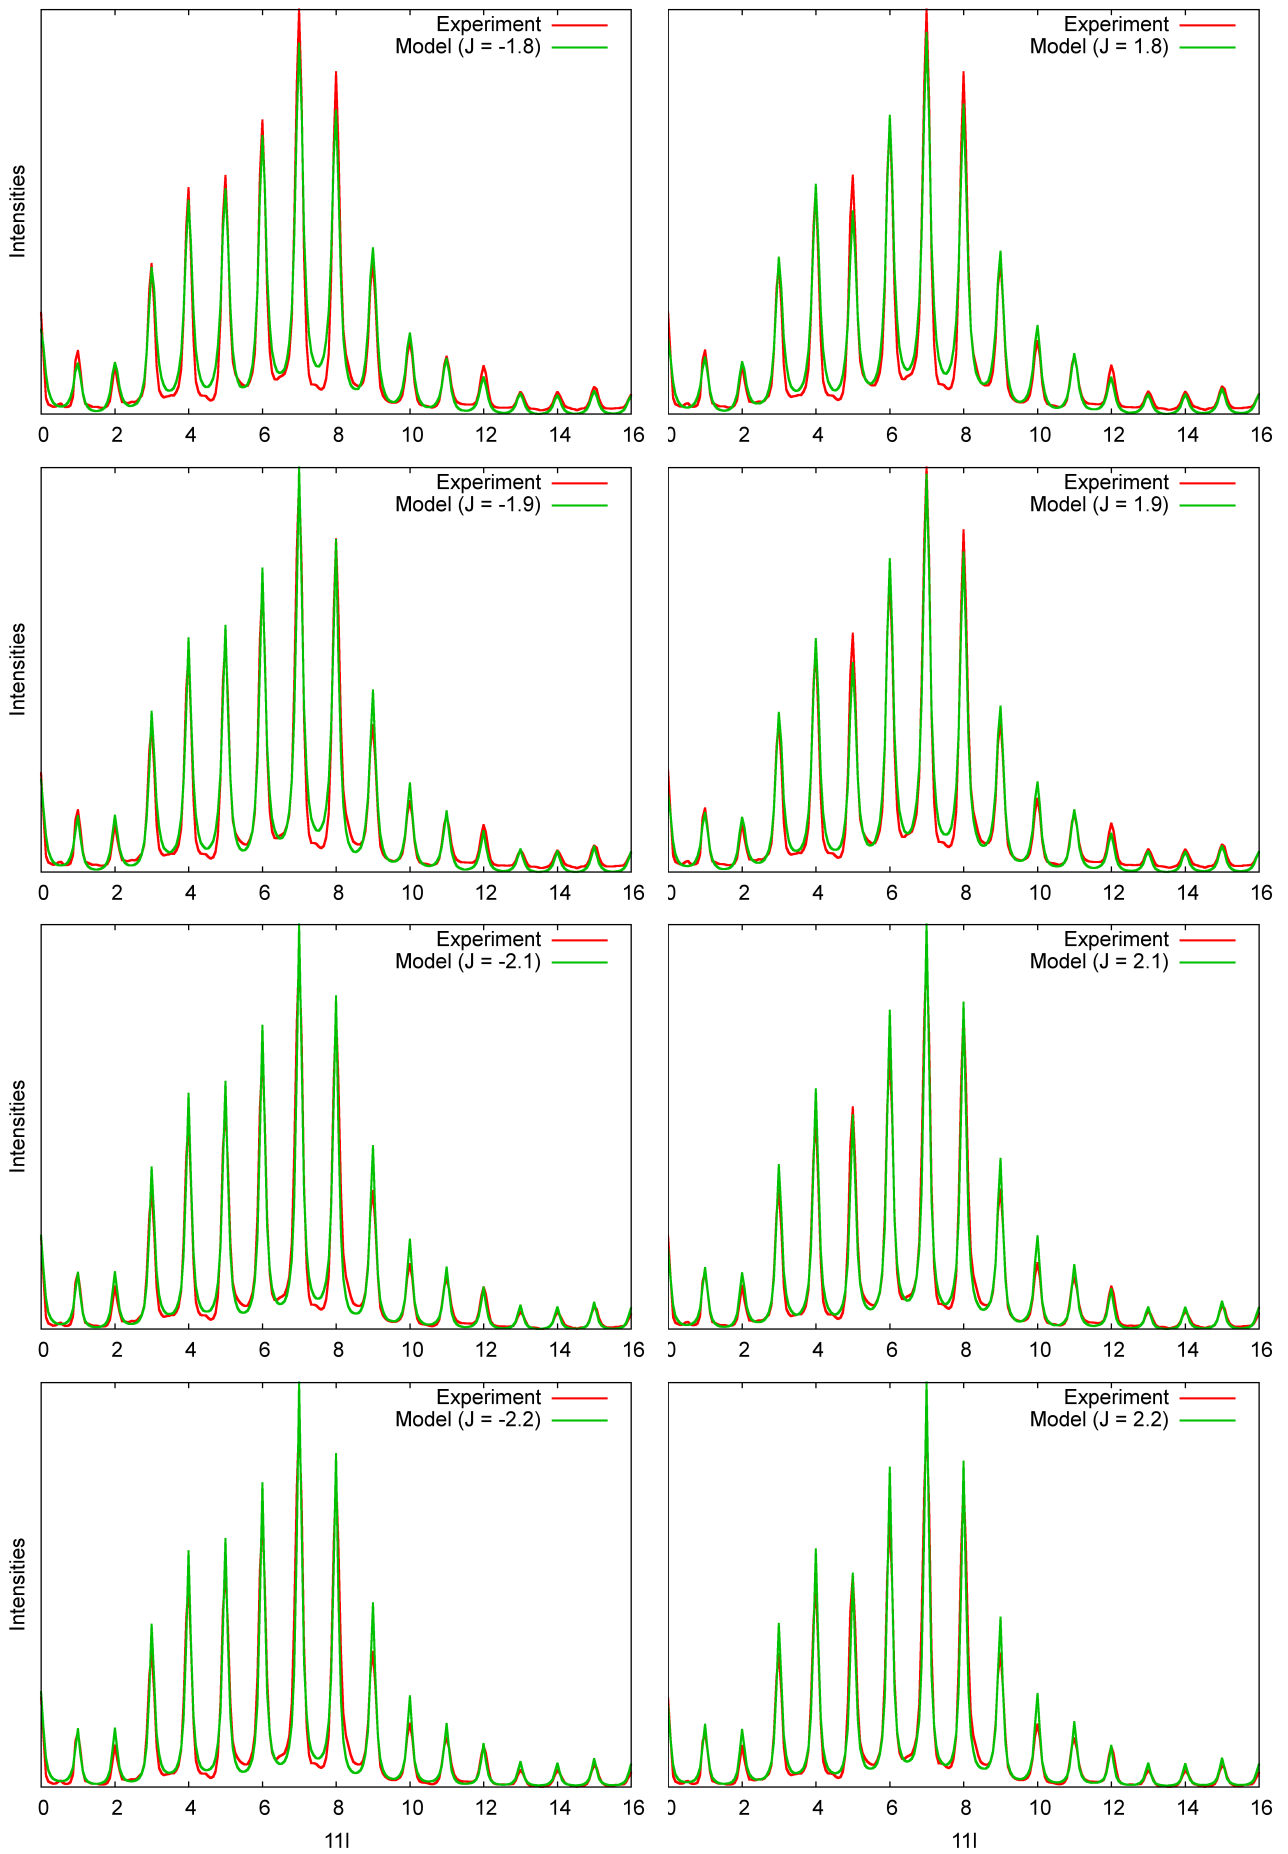

**Figure 3.** Comparison of calculated intensity profiles running through  $11l$  section of the reciprocal space for 1-D model with interaction parameter  $J = -1.8; -1.9; -2.1; -2.2$  and  $J = 1.8; 1.9; 2.1; 2.2$ .

## II.

Calculated  $h1l$ ,  $h2l$  and  $h3l$  sections of reciprocal space for 2-D model with different interaction parameters  $J_I^a$  and  $J_I^c$  according to the formula

$$H = - \sum_{i=1..m} J_1^a \delta(s_i, s_{i+1}) + \sum_{j=1..n} J_1^c \delta(s_j, s_{j+1})$$

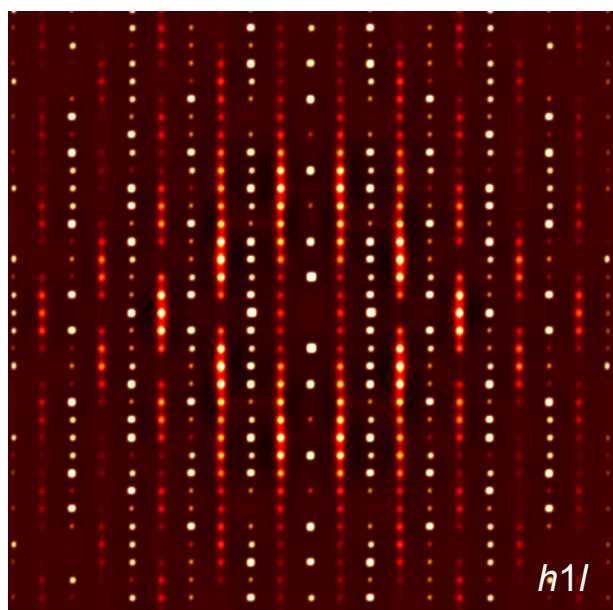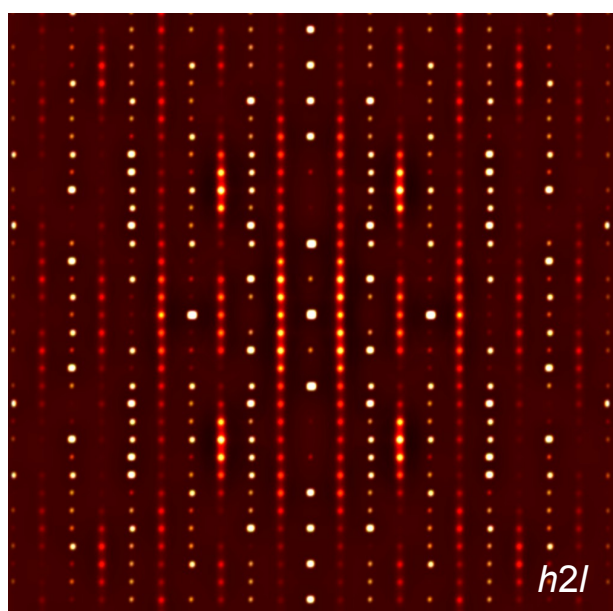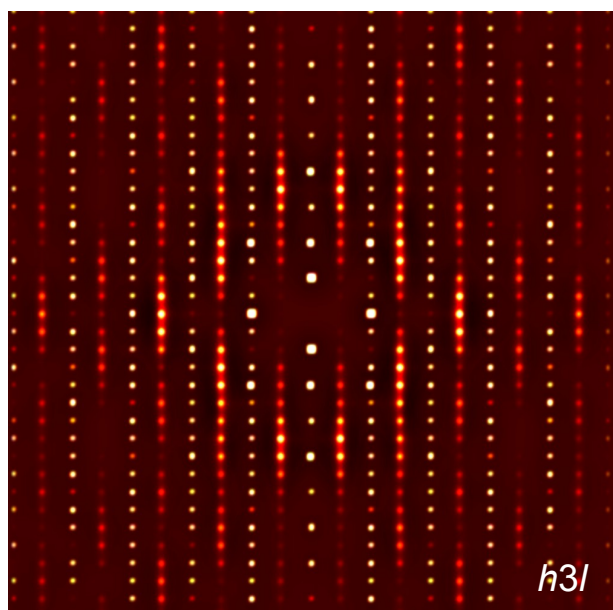

**Figure 4.** Calculated sections of reciprocal space for 2-D model with interaction parameters  $J_I^a = 2$  and  $J_I^c = -0.22$ .

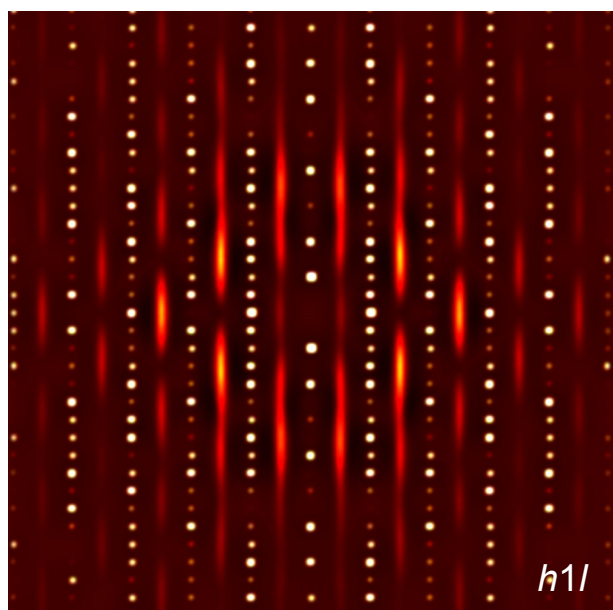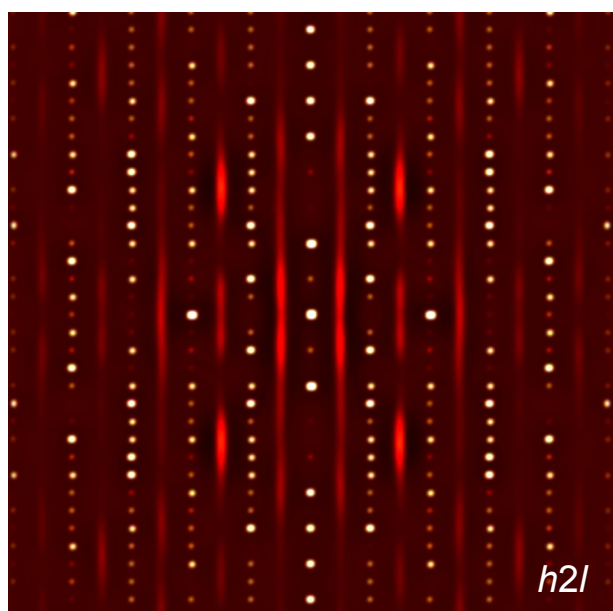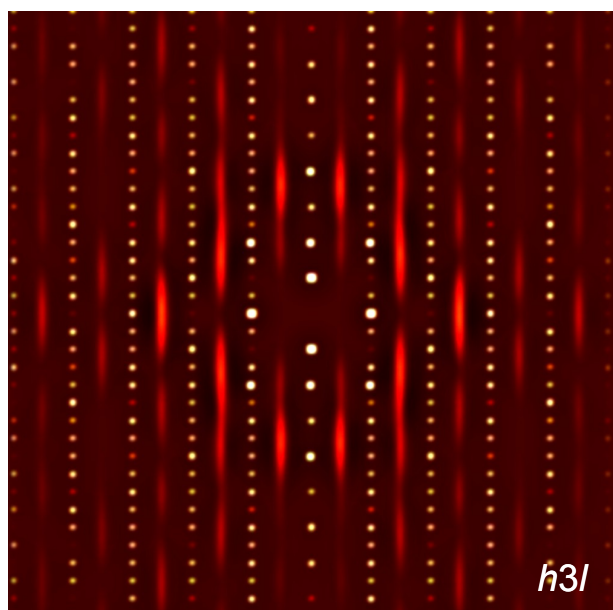

**Figure 5.** Calculated sections of reciprocal space for 2-D model with interaction parameters  $J_I^a = 2$  and  $J_I^c = 0$ .

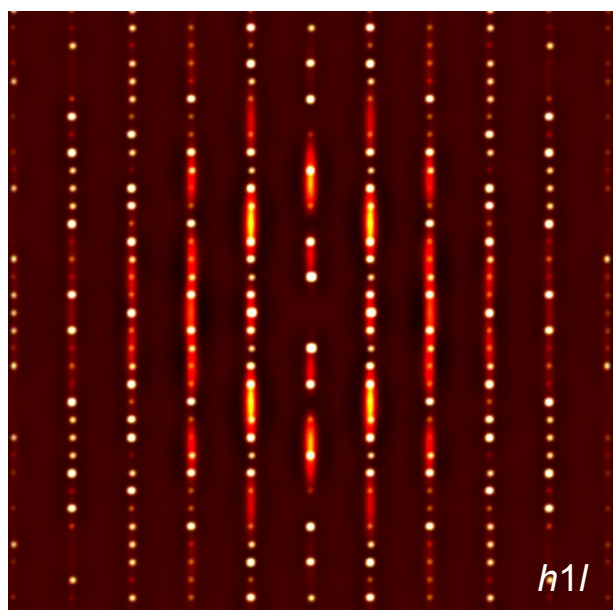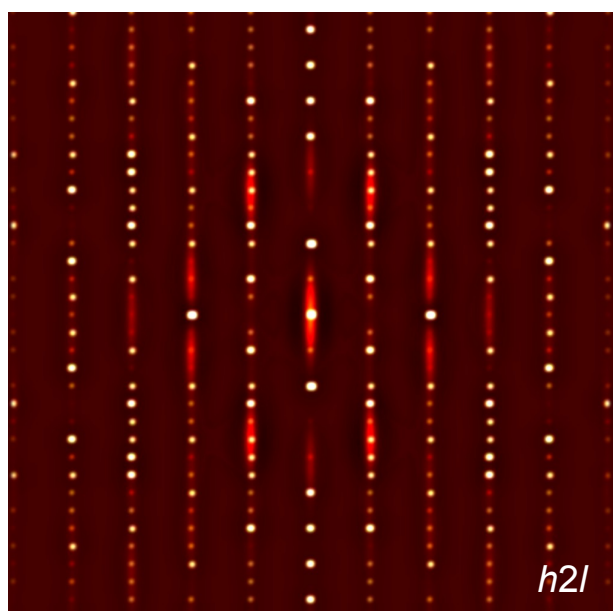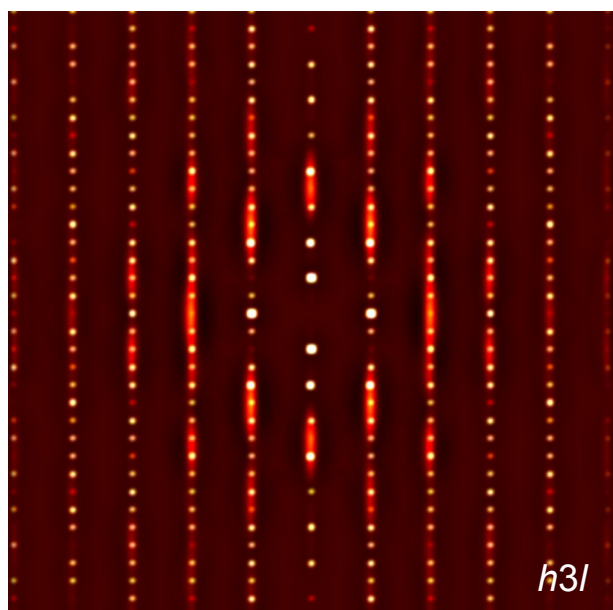

**Figure 6.** Calculated sections of reciprocal space for 2-D model with interaction parameters  $J_I^a = -2$  and  $J_I^c = 0$ .

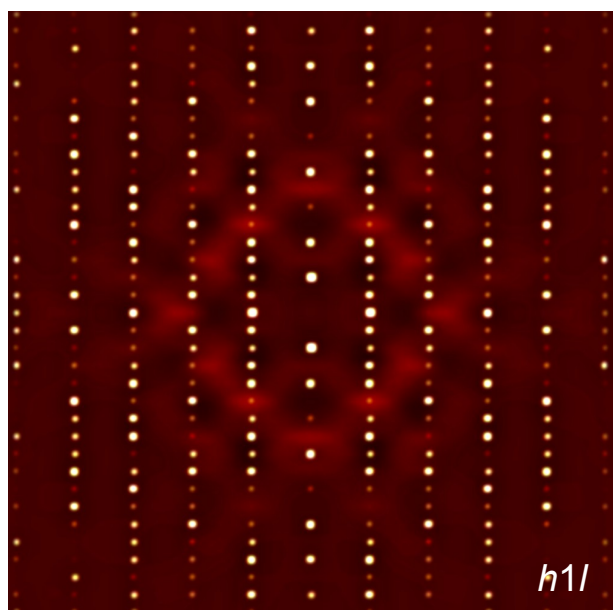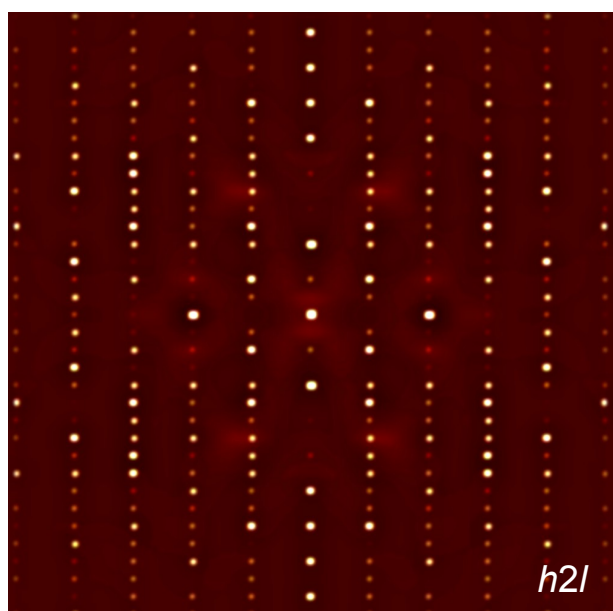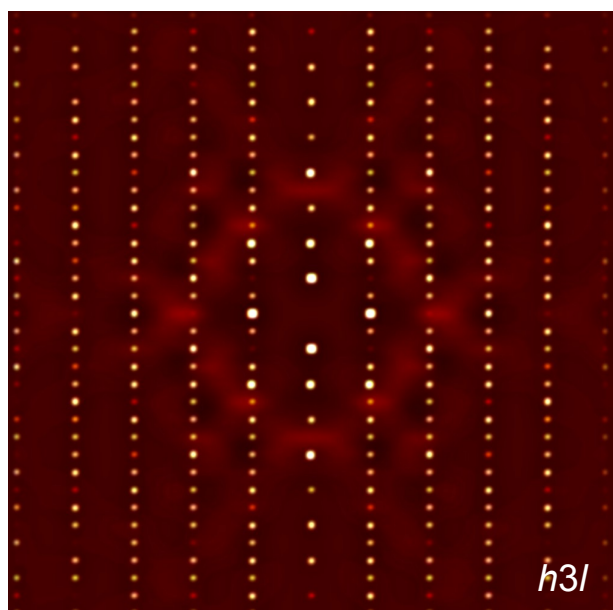

**Figure 7.** Calculated sections of reciprocal space for 2-D model with interaction parameters  $J_I^a = 0$  and  $J_I^c = -0.22$ .

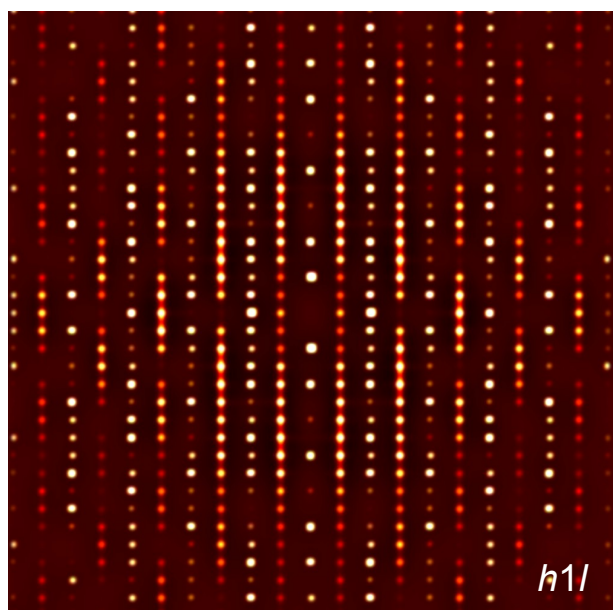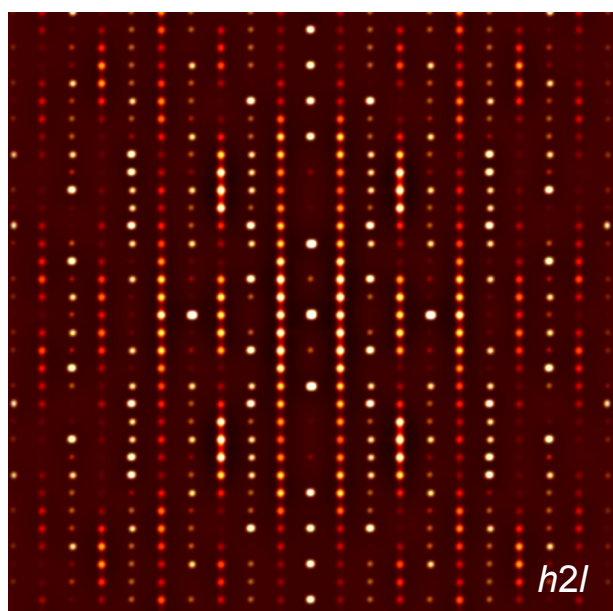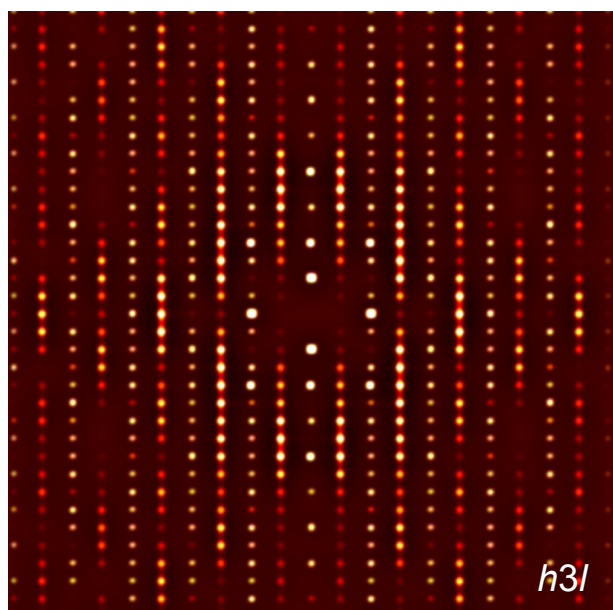

**Figure 8.** Calculated sections of reciprocal space for 2-D model with interaction parameters  $J_I^a = 5$  and  $J_I^c = -0.22$ .
